# Supplementary material
Source: Royal Society of Chemistry journal article supplement (doi:10.1039/d6nj00709k)
Supplement: d6nj00709k1.pdf [file d6nj00709k1.pdf]

## **Fe<sub>3</sub>O<sub>4</sub>-loaded phosphoric acid-modified walnut shell biochar for uranium adsorption from simulated groundwater**

Zhao Liu\*

College of Geography and Remote Sensing Sciences, Xinjiang University, Urumqi, Xinjiang 830017, PR China

### **1. Experiment**

#### **1.1. Uranium standard curve**

First, the stock uranyl nitrate solution (1000 mg/L) was diluted with an appropriate volume of deionized water to obtain the desired concentrations: 0.03, 0.10, 0.20, 0.30, 0.40, 0.50, 0.60, 0.70, 0.80, 0.90, and 1.00 mg/L. Three replicate samples were prepared for each concentration. Subsequently, the absorbance corresponding to each uranium concentration was measured at 652 nm using a UV–Vis spectrophotometer with Arsenazo (III) as the chromogenic reagent.<sup>1</sup> Finally, a calibration curve was constructed based on the relationship between absorbance and uranium concentration. The resulting standard curve is given in Equation S1:

$$y = 0.2382x - 0.00668 \quad (\text{S1})$$

where  $x$  represents the uranium concentration (mg/L) and  $y$  is the absorbance. The calibration curve exhibits a strong linear correlation over the range of 0.03–1.00 mg/L, with a high correlation coefficient ( $R^2=0.997$ ). If the uranium concentration in a sample exceeds this linear range, the solution should be appropriately diluted prior to measurement.

### **2. Figure**

---

\* Corresponding author.

E-mail addresses: liuzhao@stu.xju.edu.cn. (Zhao Liu)

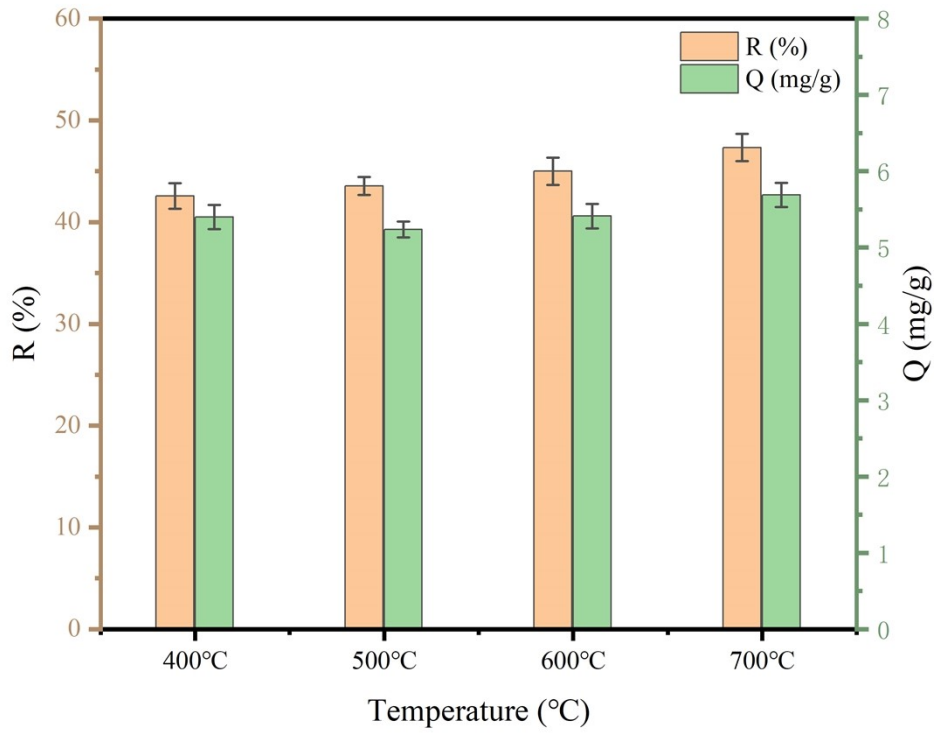

**Fig. S1** Preliminary adsorption experiment results of original walnut shell biochar (WSBC) prepared under insulation conditions of 400°C and 700°C for uranium ( $C_0 = 5 \text{ mg/L}$ ,  $\text{pH} = 5.0$ , dosage = 0.4 g/L,  $t = 60\text{min}$ ,  $T = 313 \text{ K}$ ).

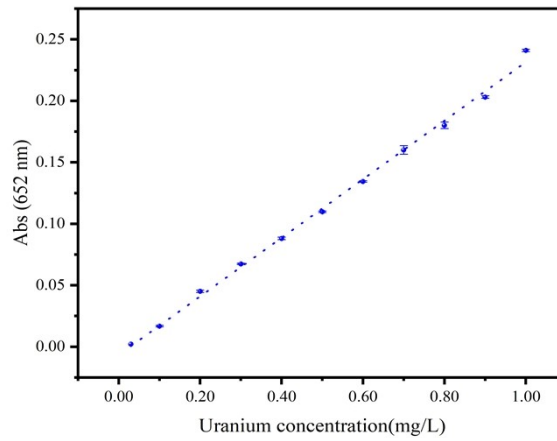

**Fig. S2** Standard curve graph of uranium and absorbance.

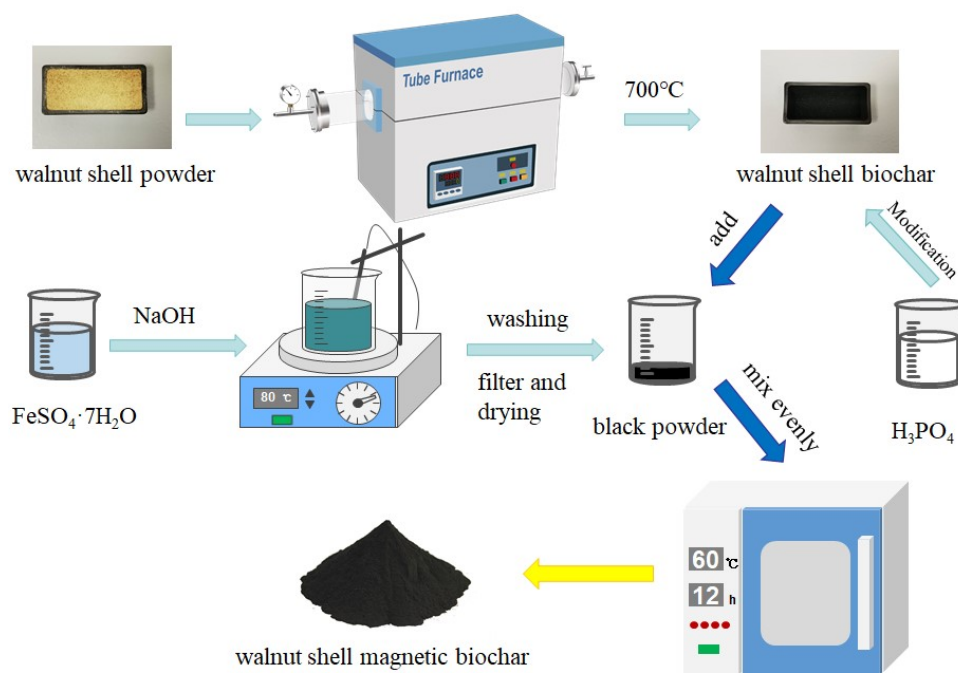

Fig. S3 Synthesis scheme of Fe<sub>3</sub>O<sub>4</sub>/P-WSBC.

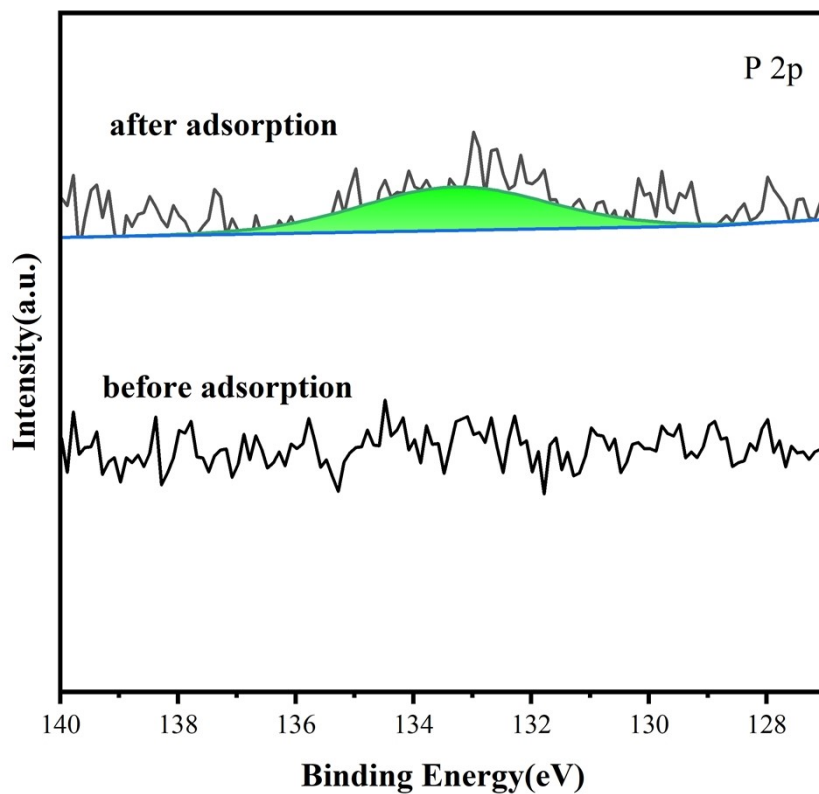

Fig. S4 XPS P2p peak of Fe<sub>3</sub>O<sub>4</sub>/P-WSBC.

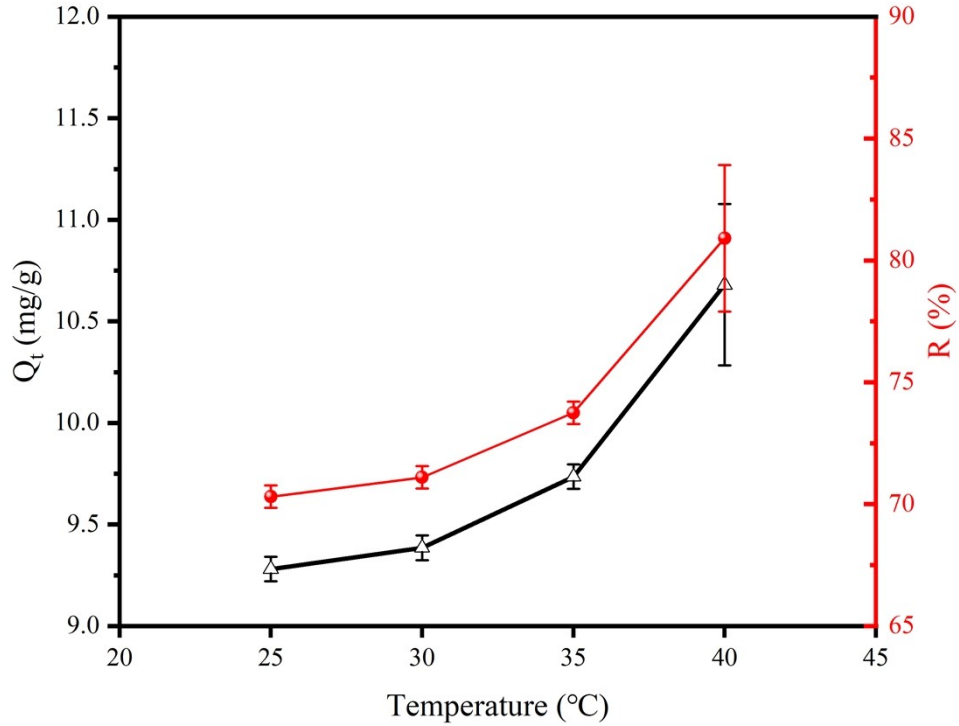

Fig. S5 The influence of temperature on uranium removal from Fe<sub>3</sub>O<sub>4</sub>/P-WSBC ( $C_0=5$  mg/L, time= 60min, dosage= 0.4 g/L, pH=6).

### 3. Table

Table S1 BET results for WSBC and Fe<sub>3</sub>O<sub>4</sub>/P-WSBC

|                                        | Average pore size<br>(nm) | Specific surface area<br>(m <sup>2</sup> /g) | Total Hole Volume<br>(cm <sup>3</sup> /g) |
|----------------------------------------|---------------------------|----------------------------------------------|-------------------------------------------|
| WSBC                                   | 2.1606                    | 348.4179                                     | 0.1882                                    |
| Fe <sub>3</sub> O <sub>4</sub> /P-WSBC | 3.5110                    | 257.8157                                     | 0.2263                                    |

Table S2 Pseudo-first-order, pseudo-second-order and Intraparticle diffusion kinetic model parameters of Fe<sub>3</sub>O<sub>4</sub>/P-WSBC on uranium

| Pseudo-first-order            |                 |       | Pseudo-second-order                               |                 |       | Intraparticle diffusion                   |            |                                           |            |                                           |            |
|-------------------------------|-----------------|-------|---------------------------------------------------|-----------------|-------|-------------------------------------------|------------|-------------------------------------------|------------|-------------------------------------------|------------|
| $k_1$<br>(min <sup>-1</sup> ) | $q_e$<br>(mg/g) | $R^2$ | $k_2$<br>g.(mg <sup>-1</sup> .min <sup>-1</sup> ) | $q_e$<br>(mg/g) | $R^2$ | $k_{i1}^2$<br>mg/g.<br>min <sup>1/2</sup> | $R_{i1}^2$ | $k_{i2}^2$<br>mg/g.<br>min <sup>1/2</sup> | $R_{i2}^2$ | $k_{i3}^2$<br>mg/g.<br>min <sup>1/2</sup> | $R_{i3}^2$ |
| 0.0266                        | 4.23            | 0.885 | 0.0461                                            | 10.79           | 0.998 | 0.643                                     | 0.962      | 0.307                                     | 0.900      | 0.108                                     | 0.885      |

**Table S3** ANOVA analysis of different models

| Mode                               | RSS    | $\chi^2$ (MSE) | RMSE | Prob > F              |
|------------------------------------|--------|----------------|------|-----------------------|
| Pseudo-first-order                 | 20.91  | 3.48           | 1.87 | $4.93 \times 10^{-4}$ |
| Pseudo-second-order                | 110.69 | 18.45          | 4.30 | < 0.0001              |
| Intra-particle diffusion (Stage 1) | 2.54   | 2.54           | 1.59 | 0.12578               |
| Intra-particle diffusion (Stage 2) | 1.14   | 1.14           | 1.07 | 0.20447               |
| Intra-particle diffusion (Stage 3) | 0.026  | 0.026          | 0.16 | 0.22039               |
| Langmuir                           | 106.90 | 21.38          | 4.62 | < 0.0001              |
| Freundlich                         | 76.81  | 15.36          | 3.92 | $2.28 \times 10^{-4}$ |

**Table S4** Langmuir and Freundlich isothermal model parameters for uranium adsorption by Fe<sub>3</sub>O<sub>4</sub>/P-WSBC

| Langmuir |                  |       | Freundlich |       |       |
|----------|------------------|-------|------------|-------|-------|
| $K_L$    | $q_{max}$ (mg/g) | $R^2$ | $K_F$      | n     | $R^2$ |
| 1.138    | 23.05            | 0.963 | 10.973     | 4.504 | 0.947 |

**Table S5** Thermodynamic modeling parameters of uranium adsorption by Fe<sub>3</sub>O<sub>4</sub>/P-WSBC

| T (K) | $\ln(K_d)$ | $\Delta G$ (kJ/mol) | $\Delta S$ (J/(mol·K)) | $\Delta H$ (kJ/mol) |
|-------|------------|---------------------|------------------------|---------------------|
| 298   | 1.78       | -4.10               |                        |                     |
| 303   | 1.82       | -4.76               |                        |                     |
| 308   | 1.95       | -5.43               | 133.51                 | 35.69               |
| 313   | 2.37       | -6.10               |                        |                     |

**References**

1 U. K. Banala, N. P. I. Das and S. R. Toleti, *J. Hazard. Mater.*, 2021, 411, 125053.
